# Supplementary material
Source: publisher site journal article supplement (https://www.kjim.org/upload/media/kjim-2025-171-Supplementary-Table-8.pdf)
Supplement: Supplementary file 1 [file kjim-2025-171-Supplementary-Table-8.pdf]

**Supplementary Table 8. Stratification analysis of the incident risk of liver cirrhosis following zoster vaccination in the propensity score-matched cohort**

| Liver cirrhosis                      | Events, n (%) | Incidence rate <sup>b)</sup> | aHR (95% CI)                      |                                   |
|--------------------------------------|---------------|------------------------------|-----------------------------------|-----------------------------------|
|                                      |               |                              | Model 1 <sup>c)</sup>             | Model 2 <sup>d)</sup>             |
| Sex                                  |               |                              |                                   |                                   |
| Male                                 |               |                              |                                   |                                   |
| Unvaccinated                         | 1,980 (0.62)  | 0.48                         | 1.0 (reference)                   | 1.0 (reference)                   |
| Vaccinated                           | 1,269 (0.39)  | 0.34                         | 0.68 (0.63 to 0.73) <sup>e)</sup> | 0.67 (0.63 to 0.72) <sup>e)</sup> |
| Female                               |               |                              |                                   |                                   |
| Unvaccinated                         | 1,414 (0.34)  | 0.34                         | 1.0 (reference)                   | 1.0 (reference)                   |
| Vaccinated                           | 1,136 (0.28)  | 0.31                         | 0.84 (0.78 to 0.91) <sup>e)</sup> | 0.82 (0.76 to 0.89) <sup>e)</sup> |
| Age (yr)                             |               |                              |                                   |                                   |
| < 60                                 |               |                              |                                   |                                   |
| Unvaccinated                         | 1,363 (0.70)  | 0.33                         | 1.0 (reference)                   | 1.0 (reference)                   |
| Vaccinated                           | 910 (0.46)    | 0.25                         | 0.68 (0.63 to 0.74) <sup>e)</sup> | 0.67 (0.62 to 0.73) <sup>e)</sup> |
| ≥ 60                                 |               |                              |                                   |                                   |
| Unvaccinated                         | 2,031 (0.38)  | 0.49                         | 1.0 (reference)                   | 1.0 (reference)                   |
| Vaccinated                           | 1,495 (0.28)  | 0.40                         | 0.79 (0.74 to 0.84) <sup>e)</sup> | 0.78 (0.73 to 0.84) <sup>e)</sup> |
| Region of residence                  |               |                              |                                   |                                   |
| Urban                                |               |                              |                                   |                                   |
| Unvaccinated                         | 1,499 (0.44)  | 0.36                         | 1.0 (reference)                   | 1.0 (reference)                   |
| Vaccinated                           | 1,143 (0.34)  | 0.31                         | 0.80 (0.74 to 0.86) <sup>e)</sup> | 0.78 (0.73 to 0.85) <sup>e)</sup> |
| Rural                                |               |                              |                                   |                                   |
| Unvaccinated                         | 1,895 (0.48)  | 0.46                         | 1.0 (reference)                   | 1.0 (reference)                   |
| Vaccinated                           | 1,262 (0.32)  | 0.34                         | 0.71 (0.66 to 0.76) <sup>e)</sup> | 0.70 (0.65 to 0.75) <sup>e)</sup> |
| Household income                     |               |                              |                                   |                                   |
| Low (0th–39th percentile)            |               |                              |                                   |                                   |
| Unvaccinated                         | 1,009 (0.48)  | 0.25                         | 1.0 (reference)                   | 1.0 (reference)                   |
| Vaccinated                           | 653 (0.31)    | 0.18                         | 0.69 (0.63 to 0.76) <sup>e)</sup> | 0.68 (0.62 to 0.76) <sup>e)</sup> |
| Middle (40th–79th percentile)        |               |                              |                                   |                                   |
| Unvaccinated                         | 1,218 (0.46)  | 0.30                         | 1.0 (reference)                   | 1.0 (reference)                   |
| Vaccinated                           | 919 (0.35)    | 0.25                         | 0.81 (0.75 to 0.89) <sup>e)</sup> | 0.80 (0.73 to 0.87) <sup>e)</sup> |
| High (80th–100th percentile)         |               |                              |                                   |                                   |
| Unvaccinated                         | 1,167 (0.46)  | 0.28                         | 1.0 (reference)                   | 1.0 (reference)                   |
| Vaccinated                           | 833 (0.32)    | 0.22                         | 0.73 (0.66 to 0.79) <sup>e)</sup> | 0.71 (0.65 to 0.78) <sup>e)</sup> |
| Body mass index (kg/m <sup>2</sup> ) |               |                              |                                   |                                   |
| < 23.0                               |               |                              |                                   |                                   |
| Unvaccinated                         | 868 (0.45)    | 0.21                         | 1.0 (reference)                   | 1.0 (reference)                   |
| Vaccinated                           | 611 (0.32)    | 0.16                         | 0.74 (0.67 to 0.82) <sup>e)</sup> | 0.73 (0.66 to 0.81) <sup>e)</sup> |
| 23.0–24.9                            |               |                              |                                   |                                   |
| Unvaccinated                         | 851 (0.42)    | 0.21                         | 1.0 (reference)                   | 1.0 (reference)                   |
| Vaccinated                           | 555 (0.28)    | 0.15                         | 0.69 (0.62 to 0.77) <sup>e)</sup> | 0.68 (0.61 to 0.76) <sup>e)</sup> |
| ≥ 25.0                               |               |                              |                                   |                                   |
| Unvaccinated                         | 1,675 (0.49)  | 0.41                         | 1.0 (reference)                   | 1.0 (reference)                   |
| Vaccinated                           | 1,239 (0.36)  | 0.33                         | 0.77 (0.72 to 0.83) <sup>e)</sup> | 0.76 (0.71 to 0.82) <sup>e)</sup> |

Supplementary Table 8. Continued

| Liver cirrhosis                            | Events, n (%) | Incidence rate <sup>b)</sup> | aHR (95% CI)                      |                                   |
|--------------------------------------------|---------------|------------------------------|-----------------------------------|-----------------------------------|
|                                            |               |                              | Model 1 <sup>c)</sup>             | Model 2 <sup>d)</sup>             |
| Smoking status <sup>a)</sup>               |               |                              |                                   |                                   |
| Non-smoker                                 |               |                              |                                   |                                   |
| Unvaccinated                               | 1,970 (0.39)  | 0.48                         | 1.0 (reference)                   | 1.0 (reference)                   |
| Vaccinated                                 | 1,474 (0.29)  | 0.40                         | 0.79 (0.74 to 0.84) <sup>e)</sup> | 0.78 (0.73 to 0.83) <sup>e)</sup> |
| Smoker                                     |               |                              |                                   |                                   |
| Unvaccinated                               | 1,424 (0.63)  | 0.35                         | 1.0 (reference)                   | 1.0 (reference)                   |
| Vaccinated                                 | 931 (0.40)    | 0.25                         | 0.68 (0.63 to 0.74) <sup>e)</sup> | 0.67 (0.62 to 0.73) <sup>e)</sup> |
| Alcohol consumption (day per week)         |               |                              |                                   |                                   |
| < 1                                        |               |                              |                                   |                                   |
| Unvaccinated                               | 1,331 (0.33)  | 0.32                         | 1.0 (reference)                   | 1.0 (reference)                   |
| Vaccinated                                 | 887 (0.22)    | 0.24                         | 0.71 (0.65 to 0.77) <sup>e)</sup> | 0.70 (0.65 to 0.77) <sup>e)</sup> |
| 1–4                                        |               |                              |                                   |                                   |
| Unvaccinated                               | 1,895 (0.61)  | 0.46                         | 1.0 (reference)                   | 1.0 (reference)                   |
| Vaccinated                                 | 1,428 (0.45)  | 0.38                         | 0.78 (0.73 to 0.84) <sup>e)</sup> | 0.77 (0.72 to 0.83) <sup>e)</sup> |
| ≥ 5                                        |               |                              |                                   |                                   |
| Unvaccinated                               | 168 (1.39)    | 0.04                         | 1.0 (reference)                   | 1.0 (reference)                   |
| Vaccinated                                 | 90 (0.68)     | 0.02                         | 0.52 (0.40 to 0.68) <sup>e)</sup> | 0.53 (0.41 to 0.69) <sup>e)</sup> |
| Physical activity                          |               |                              |                                   |                                   |
| Insufficient physical activity             |               |                              |                                   |                                   |
| Unvaccinated                               | 2,577 (0.46)  | 0.63                         | 1.0 (reference)                   | 1.0 (reference)                   |
| Vaccinated                                 | 1,835 (0.33)  | 0.49                         | 0.76 (0.71 to 0.80) <sup>e)</sup> | 0.75 (0.70 to 0.79) <sup>e)</sup> |
| Sufficient physical activity               |               |                              |                                   |                                   |
| Unvaccinated                               | 817 (0.48)    | 0.20                         | 1.0 (reference)                   | 1.0 (reference)                   |
| Vaccinated                                 | 570 (0.33)    | 0.15                         | 0.71 (0.64 to 0.79) <sup>e)</sup> | 0.70 (0.63 to 0.78) <sup>e)</sup> |
| Medication use for coronary artery disease |               |                              |                                   |                                   |
| No                                         |               |                              |                                   |                                   |
| Unvaccinated                               | 3,271 (0.46)  | 0.79                         | 1.0 (reference)                   | 1.0 (reference)                   |
| Vaccinated                                 | 2,282 (0.32)  | 0.62                         | 0.73 (0.69 to 0.77) <sup>e)</sup> | 0.72 (0.69 to 0.76) <sup>e)</sup> |
| Yes                                        |               |                              |                                   |                                   |
| Unvaccinated                               | 123 (0.47)    | 0.03                         | 1.0 (reference)                   | 1.0 (reference)                   |
| Vaccinated                                 | 123 (0.48)    | 0.03                         | 1.07 (0.84 to 1.38)               | 1.06 (0.83 to 1.36)               |
| Medication use for hypertension            |               |                              |                                   |                                   |
| No                                         |               |                              |                                   |                                   |
| Unvaccinated                               | 2,203 (0.45)  | 0.54                         | 1.0 (reference)                   | 1.0 (reference)                   |
| Vaccinated                                 | 1,518 (0.32)  | 0.41                         | 0.74 (0.70 to 0.79) <sup>e)</sup> | 0.73 (0.69 to 0.78) <sup>e)</sup> |
| Yes                                        |               |                              |                                   |                                   |
| Unvaccinated                               | 1,191 (0.49)  | 0.29                         | 1.0 (reference)                   | 1.0 (reference)                   |
| Vaccinated                                 | 887 (0.35)    | 0.24                         | 0.74 (0.68 to 0.81) <sup>e)</sup> | 0.74 (0.68 to 0.81) <sup>e)</sup> |

Supplementary Table 8. Continued

| Liver cirrhosis                   | Events, n (%) | Incidence rate <sup>b)</sup> | aHR (95% CI)                      |                                   |
|-----------------------------------|---------------|------------------------------|-----------------------------------|-----------------------------------|
|                                   |               |                              | Model 1 <sup>c)</sup>             | Model 2 <sup>d)</sup>             |
| Medication use for diabetes       |               |                              |                                   |                                   |
| No                                |               |                              |                                   |                                   |
| Unvaccinated                      | 2,844 (0.45)  | 0.69                         | 1.0 (reference)                   | 1.0 (reference)                   |
| Vaccinated                        | 1,969 (0.31)  | 0.53                         | 0.74 (0.70 to 0.78) <sup>e)</sup> | 0.73 (0.69 to 0.77) <sup>e)</sup> |
| Yes                               |               |                              |                                   |                                   |
| Unvaccinated                      | 550 (0.57)    | 0.13                         | 1.0 (reference)                   | 1.0 (reference)                   |
| Vaccinated                        | 436 (0.42)    | 0.12                         | 0.77 (0.68 to 0.87) <sup>e)</sup> | 0.77 (0.67 to 0.87) <sup>e)</sup> |
| Medication use for hyperlipidemia |               |                              |                                   |                                   |
| No                                |               |                              |                                   |                                   |
| Unvaccinated                      | 3,097 (0.50)  | 0.75                         | 1.0 (reference)                   | 1.0 (reference)                   |
| Vaccinated                        | 2,185 (0.35)  | 0.59                         | 0.75 (0.71 to 0.80) <sup>e)</sup> | 0.74 (0.70 to 0.78) <sup>e)</sup> |
| Yes                               |               |                              |                                   |                                   |
| Unvaccinated                      | 297 (0.28)    | 0.07                         | 1.0 (reference)                   | 1.0 (reference)                   |
| Vaccinated                        | 220 (0.20)    | 0.06                         | 0.71 (0.60 to 0.84) <sup>e)</sup> | 0.70 (0.59 to 0.83) <sup>e)</sup> |

aHR, adjusted hazard ratio; CI, confidence interval.

<sup>a)</sup>Non-smoker indicates individuals who do not currently smoke.

<sup>b)</sup>Incidence rate expressed as per 1,000 person-years.

<sup>c)</sup>Models 1: adjusted for age (50–54, 55–59, 60–64, and ≥ 65 years) and sex.

<sup>d)</sup>Model 2: adjusted for age (50–54, 55–59, 60–64, and ≥ 65 years); sex; household income (low income, middle income, and high income); region of residence (urban and rural); Charlson comorbidity index (0, 1, and ≥ 2); obesity (underweight [ $< 18.5 \text{ kg/m}^2$ ], normal [ $18.5\text{--}22.9 \text{ kg/m}^2$ ], overweight [ $23.0\text{--}24.9 \text{ kg/m}^2$ ], and obese [ $\geq 25.0 \text{ kg/m}^2$ ]); blood pressure (systolic blood pressure  $< 140 \text{ mmHg}$  and diastolic blood pressure  $< 90 \text{ mmHg}$  and systolic blood pressure  $\geq 140 \text{ mmHg}$  or diastolic blood pressure  $\geq 90 \text{ mmHg}$ ); fasting blood glucose ( $< 100$  and  $\geq 100 \text{ mg/dL}$ ); glomerular filtration rate ( $< 60$ ,  $60\text{--}89$ , and  $\geq 90 \text{ mL/min/1.73 m}^2$ ); smoking status (non-, ex-, and current smoker); alcohol consumption (drinks;  $< 1$ ,  $1\text{--}2$ ,  $3\text{--}4$ , and  $\geq 5$  days per week); aerobic physical activity (sufficient and insufficient); and history of medication use for coronary artery disease, diabetes mellitus, dyslipidemia, and hypertension.

<sup>e)</sup>Significant differences ( $p < 0.05$ ).
